# Supplementary material
Source: PubMed Central journal article supplement (PMC4329071)

**A****i****Whole bone marrow cells**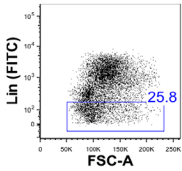**Whole mouse bone marrow transplantation**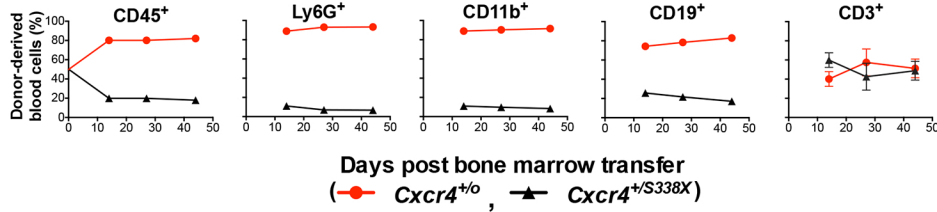**ii****Lin<sup>-</sup> bone marrow cells**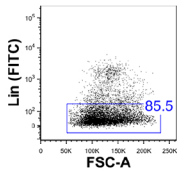**Lineage-depleted mouse bone marrow transplantation**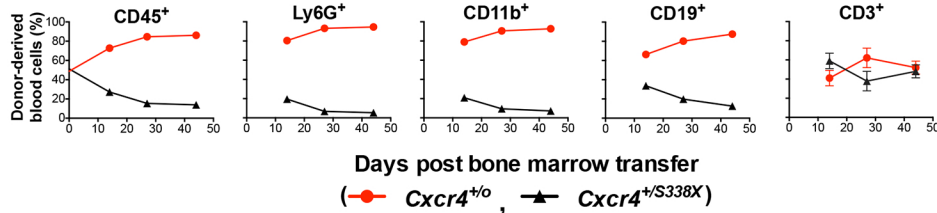**B****i****Whole bone marrow cells**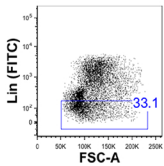**Whole mouse bone marrow transplantation**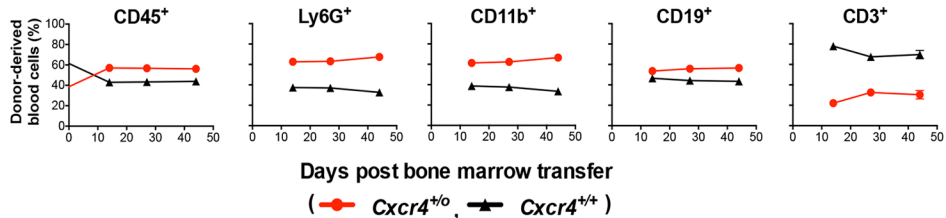**ii****Lin<sup>-</sup> bone marrow cells**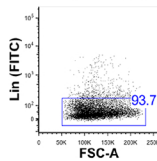**Lineage-depleted mouse bone marrow transplantation**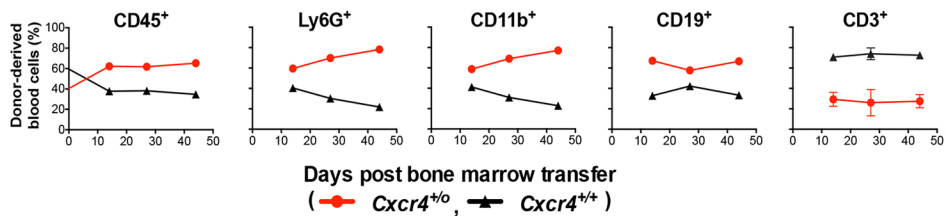

Supplement: NIHMS655808-supplement-7.pdf [file NIHMS655808-supplement-7.pdf]
