# Supplementary material
Source: PubMed Central journal article supplement (PMC4329071)
Supplement: NIHMS655808-supplement-suppl.pdf [file NIHMS655808-supplement-suppl.pdf]

**Table S1. Alphabetical List of Genes deleted in the derivative chromosome of patient WHIM-09 by whole genome sequencing (related to Figure 3A)**

| gene symbol | entrez gene id | map location | type of gene   | full name                                                           |
|-------------|----------------|--------------|----------------|---------------------------------------------------------------------|
| ACMSD       | 130013         | 2q21.3       | protein-coding | aminocarboxymuconate semialdehyde decarboxylase                     |
| ACVR1       | 90             | 2q23-q24     | protein-coding | activin A receptor, type I                                          |
| ACVR1C      | 130399         | 2q24.1       | protein-coding | activin A receptor, type IC                                         |
| ADAM17      | 6868           | 2p25         | protein-coding | ADAM metallopeptidase domain 17                                     |
| ADCY3       | 109            | 2p23.3       | protein-coding | adenylate cyclase 3                                                 |
| ANKRD30BL   | 554226         | 2q21.2       | pseudo         | ankyrin repeat domain 30B-like                                      |
| APOB        | 338            | 2p24-p23     | protein-coding | apolipoprotein B (including Ag(x) antigen)                          |
| ASXL2       | 55252          | 2p24.1       | protein-coding | additional sex combs like 2 (Drosophila)                            |
| ATP6V1C2    | 245973         | -            | protein-coding | ATPase, H <sup>+</sup> transporting, lysosomal 42kDa, V1 subunit C2 |
| BAZ2B       | 29994          | 2q24.2       | protein-coding | bromodomain adjacent to zinc finger domain, 2B                      |
| C2orf27A    | 29798          | 2q21.2       | protein-coding | chromosome 2 open reading frame 27A                                 |
| C2orf27B    | 408029         | 2q21         | protein-coding | chromosome 2 open reading frame 27B                                 |
| C2orf43     | 60526          | 2p24.1       | protein-coding | chromosome 2 open reading frame 43                                  |
| C2orf44     | 80304          | 2p23.3       | protein-coding | chromosome 2 open reading frame 44                                  |
| C2orf48     | 348738         | 2p25.1       | protein-coding | chromosome 2 open reading frame 48                                  |
| C2orf49     | 79074          | 2q12.1       | protein-coding | chromosome 2 open reading frame 49                                  |
| C2orf50     | 130813         | 2p25.1       | protein-coding | chromosome 2 open reading frame 50                                  |
| C2orf84     | 653140         | 2p23.3       | protein-coding | chromosome 2 open reading frame 84                                  |
| CCDC148     | 130940         | 2q24.1       | protein-coding | coiled-coil domain containing 148                                   |
| CCNT2       | 905            | 2q21.3       | protein-coding | cyclin T2                                                           |
| CD302       | 9936           | 2q24.2       | protein-coding | CD302 molecule                                                      |
| CENPO       | 79172          | 2p23.3       | protein-coding | centromere protein O                                                |
| CXCR4       | 7852           | 2q21         | protein-coding | chemokine (C-X-C motif) receptor 4                                  |
| CYS1        | 192668         | 2p25.1       | protein-coding | cystin 1                                                            |
| CYTIP       | 9595           | 2q11.2       | protein-coding | cytohesin 1 interacting protein                                     |

|             |        |            |                |                                                                                                  |
|-------------|--------|------------|----------------|--------------------------------------------------------------------------------------------------|
| DAPL1       | 92196  | 2q24.1     | protein-coding | death associated protein-like 1                                                                  |
| DARS        | 1615   | 2q21.3     | protein-coding | aspartyl-tRNA synthetase                                                                         |
| DDX1        | 1653   | 2p24       | protein-coding | DEAD (Asp-Glu-Ala-Asp) box polypeptide 1                                                         |
| DNAJC27     | 51277  | 2p23.3     | protein-coding | DnaJ (Hsp40) homolog, subfamily C, member 27                                                     |
| DNAJC27-AS1 | 729723 | 2p23.3     | miscRNA        | DNAJC27 antisense RNA 1 (non-protein coding)                                                     |
| DNMT3A      | 1788   | 2p23       | protein-coding | DNA (cytosine-5-)-methyltransferase 3 alpha                                                      |
| DPP4        | 1803   | 2q24.3     | protein-coding | dipeptidyl-peptidase 4                                                                           |
| DTNB        | 1838   | 2p24       | protein-coding | dystrobrevin, beta                                                                               |
| E2F6        | 1876   | 2p25.1     | protein-coding | E2F transcription factor 6                                                                       |
| EFR3B       | 22979  | 2p23.3     | protein-coding | EFR3 homolog B ( <i>S. cerevisiae</i> )                                                          |
| ERMN        | 57471  | 2q24.1     | protein-coding | ermin, ERM-like protein                                                                          |
| FAM49A      | 81553  | 2p24.2     | protein-coding | family with sequence similarity 49, member A                                                     |
| FAM84A      | 151354 | 2p24.3     | protein-coding | family with sequence similarity 84, member A                                                     |
| FAP         | 2191   | 2q23       | protein-coding | fibroblast activation protein, alpha                                                             |
| FHL2        | 2274   | 2q12.2     | protein-coding | four and a half LIM domains 2                                                                    |
| FIGN        | 55137  | 2q24.3     | protein-coding | fidgetin                                                                                         |
| FKBP1B      | 2281   | 2p23.3     | protein-coding | FK506 binding protein 1B, 12.6 kDa                                                               |
| FLJ12334    | 400946 | 2p24.1     | miscRNA        | -                                                                                                |
| FLJ33534    | 285150 | 2p25.1     | miscRNA        | -                                                                                                |
| GALNT13     | 114805 | 2q24.1     | protein-coding | UDP-N-acetyl-alpha-D-galactosamine:polypeptide N-acetylgalactosaminyltransferase 13 (GalNAc-T13) |
| GALNT5      | 11227  | 2q24.1     | protein-coding | UDP-N-acetyl-alpha-D-galactosamine:polypeptide N-acetylgalactosaminyltransferase 5 (GalNAc-T5)   |
| GCA         | 25801  | 2q24.2     | protein-coding | grancalcin, EF-hand calcium binding protein                                                      |
| GCG         | 2641   | 2q36-q37   | protein-coding | glucagon                                                                                         |
| GDF7        | 151449 | 2p24.1     | protein-coding | growth differentiation factor 7                                                                  |
| GEN1        | 348654 | 2p24.2     | protein-coding | Gen endonuclease homolog 1 ( <i>Drosophila</i> )                                                 |
| GPR39       | 2863   | 2q21-q22   | protein-coding | G protein-coupled receptor 39                                                                    |
| GPR45       | 11250  | 2q11.1-q12 | protein-coding | G protein-coupled receptor 45                                                                    |
| GREB1       | 9687   | 2p25.1     | protein-coding | growth regulation by estrogen in breast cancer 1                                                 |

|              |           |             |                |                                                                           |
|--------------|-----------|-------------|----------------|---------------------------------------------------------------------------|
| GRHL1        | 29841     | 2p25.1      | protein-coding | grainyhead-like 1 (Drosophila)                                            |
| HPCAL1       | 3241      | 2p25.1      | protein-coding | hippocalcin-like 1                                                        |
| HS1BP3       | 64342     | 2p24.1      | protein-coding | HCLS1 binding protein 3                                                   |
| IFIH1        | 64135     | 2q24        | protein-coding | interferon induced with helicase C domain 1                               |
| IL18R1       | 8809      | 2q12        | protein-coding | interleukin 18 receptor 1                                                 |
| IL18RAP      | 8807      | 2q12        | protein-coding | interleukin 18 receptor accessory protein                                 |
| IL1R1        | 3554      | 2q12        | protein-coding | interleukin 1 receptor, type I                                            |
| IL1R2        | 7850      | 2q12        | protein-coding | interleukin 1 receptor, type II                                           |
| IL1RL1       | 9173      | 2q12        | protein-coding | interleukin 1 receptor-like 1                                             |
| IL1RL2       | 8808      | 2q12        | protein-coding | interleukin 1 receptor-like 2                                             |
| ITGB6        | 3694      | 2q24.2      | protein-coding | integrin, beta 6                                                          |
| ITSN2        | 50618     | 2pter-p25.1 | protein-coding | intersectin 2                                                             |
| KCNF1        | 3754      | 2p25        | protein-coding | potassium voltage-gated channel, subfamily F, member 1                    |
| KCNH7        | 90134     | 2q24.2      | protein-coding | potassium voltage-gated channel, subfamily H (eag-related), member 7      |
| KCNJ3        | 3760      | 2q24.1      | protein-coding | potassium inwardly-rectifying channel, subfamily J, member 3              |
| KCNS3        | 3790      | 2p24        | protein-coding | potassium voltage-gated channel, delayed-rectifier, subfamily S, member 3 |
| KIF3C        | 3797      | 2p23        | protein-coding | kinesin family member 3C                                                  |
| KLF11        | 8462      | 2p25        | protein-coding | Kruppel-like factor 11                                                    |
| LAPTM4A      | 9741      | 2p24.1      | protein-coding | lysosomal protein transmembrane 4 alpha                                   |
| LCT          | 3938      | 2q21        | protein-coding | lactase                                                                   |
| LOC100129961 | 100129961 | 2q21.3      | miscRNA        | -                                                                         |
| LOC100144595 | 100144595 | -           | protein-coding | -                                                                         |
| LOC100287010 | 100287010 | 2q12.1      | miscRNA        | -                                                                         |
| LOC100506421 | 100506421 | 2q12        | miscRNA        | -                                                                         |
| LOC100506474 | 100506474 | 2p24        | miscRNA        | -                                                                         |
| LOC100507600 | 100507600 | -           | miscRNA        | -                                                                         |
| LOC150568    | 150568    | 2q12.1      | miscRNA        | -                                                                         |

|            |           |            |                |                                                                             |
|------------|-----------|------------|----------------|-----------------------------------------------------------------------------|
| LOC284998  | 284998    | 2q12.1     | miscRNA        | -                                                                           |
| LOC285000  | 285000    | 2q12.2     | miscRNA        | -                                                                           |
| LOC375190  | 375190    | 2p23.3     | protein-coding | -                                                                           |
| LOC554201  | 554201    | 2q24.1     | miscRNA        | -                                                                           |
| LOC645949  | 645949    | 2p24.1     | miscRNA        | -                                                                           |
| LPIN1      | 23175     | 2p25.1     | protein-coding | lipin 1                                                                     |
| LY75       | 4065      | 2q24       | protein-coding | lymphocyte antigen 75                                                       |
| LY75-CD302 | 100526664 | 2q         | protein-coding | LY75-CD302 readthrough                                                      |
| LYPD1      | 116372    | 2q21.2     | protein-coding | LY6/PLAUR domain containing 1                                               |
| MAP4K4     | 9448      | 2q11.2-q12 | protein-coding | mitogen-activated protein kinase kinase kinase kinase 4                     |
| MARCH7     | 64844     | 2q24.2     | protein-coding | membrane-associated ring finger (C3HC4) 7                                   |
| MATN3      | 4148      | 2p24-p23   | protein-coding | matrilin 3                                                                  |
| MCM6       | 4175      | 2q21       | protein-coding | minichromosome maintenance complex component 6                              |
| MFSD2B     | 388931    | 2p23.3     | protein-coding | major facilitator superfamily domain containing 2B                          |
| MFSD9      | 84804     | 2q12.1     | protein-coding | major facilitator superfamily domain containing 9                           |
| MGAT5      | 4249      | 2q21.3     | protein-coding | mannosyl (alpha-1,6-)-glycoprotein beta-1,6-N-acetylglucosaminyltransferase |
| MIR128-1   | 406915    | 2q21.3     | miscRNA        | microRNA 128-1                                                              |
| MIR1301    | 100302246 | -          | miscRNA        | microRNA 1301                                                               |
| MIR3125    | 100422986 | -          | miscRNA        | microRNA 3125                                                               |
| MIR3679    | 100500878 | -          | miscRNA        | microRNA 3679                                                               |
| MIR4261    | 100422929 | -          | miscRNA        | microRNA 4261                                                               |
| MIR4262    | 100422996 | -          | miscRNA        | microRNA 4262                                                               |
| MIR4429    | 100616469 | -          | miscRNA        | microRNA 4429                                                               |
| MIR4757    | 100616307 | -          | miscRNA        | microRNA 4757                                                               |
| MIR4772    | 100616157 | -          | miscRNA        | microRNA 4772                                                               |
| MIR4785    | 100616364 | -          | miscRNA        | microRNA 4785                                                               |
| MIR663B    | 100313824 | -          | miscRNA        | microRNA 663b                                                               |
| MRPS9      | 64965     | 2q12.1     | protein-coding | mitochondrial ribosomal protein S9                                          |
| MSGN1      | 343930    | 2p24.2     | protein-coding | mesogenin 1                                                                 |

|              |           |          |                |                                                                              |
|--------------|-----------|----------|----------------|------------------------------------------------------------------------------|
| MYCN         | 4613      | 2p24.3   | protein-coding | v-myc myelocytomatosis viral related oncogene, neuroblastoma derived (avian) |
| MYCNOS       | 10408     | 2p24.1   | miscRNA        | MYCN opposite strand/antisense RNA (non-protein coding)                      |
| NBAS         | 51594     | 2p24     | protein-coding | neuroblastoma amplified sequence                                             |
| NCKAP5       | 344148    | 2q21.2   | protein-coding | NCK-associated protein 5                                                     |
| NCOA1        | 8648      | 2p23     | protein-coding | nuclear receptor coactivator 1                                               |
| NOL10        | 79954     | 2p25.1   | protein-coding | nucleolar protein 10                                                         |
| NT5C1B       | 93034     | 2p24.2   | protein-coding | 5'-nucleotidase, cytosolic IB                                                |
| NT5C1B-RDH14 | 100526794 | 2p       | protein-coding | NT5C1B-RDH14 readthrough                                                     |
| NTSR2        | 23620     | 2p25.1   | protein-coding | neurotensin receptor 2                                                       |
| ODC1         | 4953      | 2p25     | protein-coding | ornithine decarboxylase 1                                                    |
| OSR1         | 130497    | 2p24.1   | protein-coding | odd-skipped related 1 (Drosophila)                                           |
| PDIA6        | 10130     | 2p25.1   | protein-coding | protein disulfide isomerase family A, member 6                               |
| PFN4         | 375189    | 2p23.3   | protein-coding | profilin family, member 4                                                    |
| PKP4         | 8502      | 2q24.1   | protein-coding | plakophilin 4                                                                |
| PLA2R1       | 22925     | 2q23-q24 | protein-coding | phospholipase A2 receptor 1, 180kDa                                          |
| POMC         | 5443      | 2p23.3   | protein-coding | proopiomelanocortin                                                          |
| POTEKP       | 440915    | 2q21.1   | pseudo         | POTE ankyrin domain family, member K, pseudogene                             |
| POU3F3       | 5455      | 2q12.1   | protein-coding | POU class 3 homeobox 3                                                       |
| PQLC3        | 130814    | 2p25.1   | protein-coding | PQ loop repeat containing 3                                                  |
| PSMD14       | 10213     | 2q24.2   | protein-coding | proteasome (prosome, macropain) 26S subunit, non-ATPase, 14                  |
| PTRHD1       | 391356    | 2p23.3   | protein-coding | peptidyl-tRNA hydrolase domain containing 1                                  |
| PUM2         | 23369     | 2p22-p21 | protein-coding | pumilio homolog 2 (Drosophila)                                               |
| R3HDM1       | 23518     | 2q21.3   | protein-coding | R3H domain containing 1                                                      |
| RAB3GAP1     | 22930     | 2q21.3   | protein-coding | RAB3 GTPase activating protein subunit 1 (catalytic)                         |
| RAD51AP2     | 729475    | 2p24.2   | protein-coding | RAD51 associated protein 2                                                   |
| RBMS1        | 5937      | 2q24.2   | protein-coding | RNA binding motif, single stranded interacting protein 1                     |
| RDH14        | 57665     | 2p24.2   | protein-coding | retinol dehydrogenase 14 (all-trans/9-cis/11-cis)                            |

|          |           |             |                |                                                                              |
|----------|-----------|-------------|----------------|------------------------------------------------------------------------------|
| RHOB     | 388       | 2p24        | protein-coding | ras homolog gene family, member B                                            |
| ROCK2    | 9475      | 2p24        | protein-coding | Rho-associated, coiled-coil containing protein kinase 2                      |
| RRM2     | 6241      | 2p25-p24    | protein-coding | ribonucleotide reductase M2                                                  |
| SDC1     | 6382      | 2p24.1      | protein-coding | syndecan 1                                                                   |
| SF3B14   | 51639     | 2pter-p25.1 | protein-coding | -                                                                            |
| SLC4A10  | 57282     | 2q23-q24    | protein-coding | solute carrier family 4, sodium bicarbonate transporter, member 10           |
| SLC9A2   | 6549      | 2q11.2      | protein-coding | solute carrier family 9 (sodium/hydrogen exchanger), member 2                |
| SLC9A4   | 389015    | 2q12.1      | protein-coding | solute carrier family 9 (sodium/hydrogen exchanger), member 4                |
| SMC6     | 79677     | 2p24.2      | protein-coding | structural maintenance of chromosomes 6                                      |
| SNORA80B | 100302743 | 2p25.1      | snoRNA         | small nucleolar RNA, H/ACA box 80B                                           |
| TAF1B    | 9014      | 2p25        | protein-coding | TATA box binding protein (TBP)-associated factor, RNA polymerase I, B, 63kDa |
| TANC1    | 85461     | 2q24.2      | protein-coding | tetratricopeptide repeat, ankyrin repeat and coiled-coil containing 1        |
| TANK     | 10010     | 2q24-q31    | protein-coding | TRAF family member-associated NFKB activator                                 |
| TBR1     | 10716     | 2q24        | protein-coding | T-box, brain, 1                                                              |
| TGFBRAP1 | 9392      | 2q12.1      | protein-coding | transforming growth factor, beta receptor associated protein 1               |
| TMEM163  | 81615     | 2q21.3      | protein-coding | transmembrane protein 163                                                    |
| TMEM182  | 130827    | 2q12.1      | protein-coding | transmembrane protein 182                                                    |
| TP53I3   | 9540      | 2p23.3      | protein-coding | tumor protein p53 inducible protein 3                                        |
| TRIB2    | 28951     | 2p24.3      | protein-coding | tribbles homolog 2 (Drosophila)                                              |
| TTC32    | 130502    | 2p24.1      | protein-coding | tetratricopeptide repeat domain 32                                           |
| UBXN4    | 23190     | 2q21.3      | protein-coding | UBX domain protein 4                                                         |
| UPP2     | 151531    | 2q24.1      | protein-coding | uridine phosphorylase 2                                                      |
| VSNL1    | 7447      | 2p24.3      | protein-coding | visinin-like 1                                                               |
| WDR35    | 57539     | 2p24.1      | protein-coding | WD repeat domain 35                                                          |
| WDSUB1   | 151525    | 2q24.2      | protein-coding | WD repeat, sterile alpha motif and U-box domain containing 1                 |

|        |       |        |                |                                                                                           |
|--------|-------|--------|----------------|-------------------------------------------------------------------------------------------|
| YSK4   | 80122 | 2q21.3 | protein-coding | YSK4 Sps1/Ste20-related kinase homolog (S. cerevisiae)                                    |
| YWHAQ  | 10971 | 2p25.1 | protein-coding | tyrosine 3-monooxygenase/tryptophan 5-monooxygenase activation protein, theta polypeptide |
| ZRANB3 | 84083 | 2q21.3 | protein-coding | zinc finger, RAN-binding domain containing 3                                              |

**Table S2.** List of the orientation of the 18 pieces of the derivative chromosome of patient WHIM-09 and their nucleotide site of connections derived from whole genome sequencing of neutrophil DNA (related to Figure 3B). Numbers are based on the chromosome 2 sequence of the hg19 reference version of the human genome project. Note red numbers are uncertain because repetitive sequences in the region of the connection make assigning a specific nucleotide ambiguous.

| <b>Piece 1</b> | <b>Piece 2</b> | <b>Orientation</b> | <b>5' End (Head)</b> | <b>3' End (Tail)</b> |
|----------------|----------------|--------------------|----------------------|----------------------|
| 1              | 5              | Head to Head       | 9650469              | 92323543             |
| 5              | 6              | Tail to Tail       | 26227289             | 102167978            |
| 6              | 17             | Head to Tail       | 102168450            | 156704625            |
| 17             | 12             | Head to Head       | 157479872            | 134383040            |
| 12             | 3              | Tail to Tail       | 134379440            | 18013669             |
| 3              | 15             | Head to Head       | 18014058             | 137413687            |
| 15             | 16             | Tail to Head       | 137402471            | 155186295            |
| 16             | 13             | Tail to Tail       | 137413696            | 134383068            |
| 13             | 10             | Head to Head       | 134384129            | 134208472            |
| 10             | 8              | Tail to Head       | 133712996            | 132361705            |
| 8              | 4              | Tail to Head       | 106220579            | 24238501             |
| 4              | 14             | Tail to Tail       | 22647206             | 137344145            |
| 14             | 7              | Head to Tail       | 137350425            | 92314297             |



|           |           |                     |                  |                  |
|-----------|-----------|---------------------|------------------|------------------|
| <b>7</b>  | <b>2</b>  | <b>Head to Head</b> | <b>102176282</b> | <b>13364053</b>  |
| <b>2</b>  | <b>9</b>  | <b>Tail to Tail</b> | <b>13332820</b>  | <b>133689046</b> |
| <b>9</b>  | <b>11</b> | <b>Head to Head</b> | <b>133712975</b> | <b>134248797</b> |
| <b>11</b> | <b>18</b> | <b>Tail to Tail</b> | <b>134208529</b> | <b>164835205</b> |

## Supplemental Figure Legends

### Supplemental Figure 1. Bone marrow Testing for ALK activity (related to Figure 1D)

Two representative photomicrographs from a WHIM-09 bone marrow biopsy are shown. On the left is a typical hematoxylin and eosin stain and on the right is an immunohistochemical stain for anaplastic lymphoma receptor tyrosine kinase (*ALK*) activity. Lack of brown color indicates that although the *ALK* gene is translocated, enzymatic activity is not increased.

### Supplemental Figure 2. Chromothripsis is the mechanism for loss of *CXCR4*<sup>R334X</sup> in patient WHIM-09 (related to Figure 3)

(A) Microarray analysis of bone marrow cell DNA using the Affymetrix Cytoscan HD array. Analysis of copy number state and single nucleotide polymorphism variation using the Chromosome Analysis suite software revealed 7 distinct areas of chromosome 2 that were deleted (red boxes).

(B) Higher resolution microarray view of the 4th and 5th deleted regions reveals that *CXCR4* is located in the 5th deleted region.

### Supplemental Figure 3. Fusion genes created by chromothripsis on chromosome 2 of patient WHIM-09 (related to Figure 3)

Gene names are indicated above the brackets delimiting gene elements. P, promoter; E, exon.

### Supplemental Figure 4. Gating strategy for purification of hematopoietic stem and progenitor cells from bone marrow of patient WHIM-09 (related to Figure 4D)

Bone marrow aspirate underwent red cell lysis and washing and then was stained with marker specific monoclonal antibodies. An initial sort to enrich CD34<sup>+</sup> cells was then performed (left) prior to a second sorting procedure using the indicated gating and sorting strategy (right) to collect HSC and progenitor cells. (See also Figure 4F)

**Supplemental Figure 5. Hematopoietic stem cell frequency in bone marrow from donor mice is not affected by *Cxcr4* haploinsufficiency (related to Figure 5)**

Donor mice used for transplantation experiments were screened for LSK and HSC frequency in bone marrow. The following donor strains were used: *Cxcr4*<sup>+/*o*</sup> on a CD45.2 congenic background (*Cxcr4*<sup>+/*o*</sup> (CD45.2)) and its littermates (*Cxcr4*<sup>+/*+*</sup> (CD45.2)), and *Cxcr4*<sup>+/*S338X*</sup> on a CD45.1xCD45.2 background (*Cxcr4*<sup>+/*S338X*</sup> (CD45.1/CD45.2)) and its littermates (*Cxcr4*<sup>+/*+*</sup> (CD45.1/CD45.2)). A. Gating scheme (Mayle et al., 2013). HSCs are gated as Flt3<sup>-</sup> Lin<sup>-</sup> Sca1<sup>+</sup> c-Kit<sup>+</sup> (Flt3<sup>-</sup>LSK) which include long-term and short-term HSCs. B. Frequency of LSK cells. C. Frequency of HSCs. Data are expressed as mean ± SEM from two mice in each group, and repeated once with similar results.

**Supplemental Figure 6. Lineage depletion of donor bone marrow cells does not affect the engraftment advantage of *Cxcr4* haploinsufficient cells (related to Figure 6)**

**(A) Engraftment advantage of *Cxcr4*<sup>+/*o*</sup> vs. *Cxcr4*<sup>+/*S338X*</sup> lineage-depleted donor bone marrow.** Bone marrow cells from donors with a *Cxcr4*<sup>+/*o*</sup> genotype on a homozygous CD45.2 background and *Cxcr4*<sup>+/*S338X*</sup> on a heterozygous CD45.1/45.2 background were

mixed equally and then 5 million whole bone marrow cells (i) or 400,000 lineage depleted bone marrow cells (ii) were injected intravenously into each CD45.1 recipient mouse that had been lethally irradiated 8 hours before injection.

**(B) Engraftment advantage of *Cxcr4*<sup>+/-</sup> vs. *Cxcr4*<sup>+/+</sup> lineage-depleted donor bone marrow.** Bone marrow cells from donors with a *Cxcr4*<sup>+/-</sup> genotype on a homozygous CD45.2 background and *Cxcr4*<sup>+/+</sup> on a heterozygous CD45.1/CD45.2 background were mixed equally and then 5 million whole bone marrow cells or 400,000 lineage depleted bone marrow cells were injected intravenously into each CD45.1 recipient mouse that had been lethally irradiated 8 hours before injection.

All results shown in A and B are from a single experiment. Blood draws at weeks 2, 4 and 6 for flow cytometry were performed to determine which mouse bone marrow cell preparations would engraft more readily. Boxes in the FACS plots at the left of each section show the percentage of total donor cells injected that were Lin<sup>-</sup>. Time course data are shown as the mean ± SEM results from whole bone marrow cell transplanted mice (n = 2) or lineage depleted bone marrow cell transplanted mice (n= 5) for the various blood leukocyte subpopulations shown.

**Supplemental Figure 7. Long-term reconstitution of blood leukocytes after competitive transplantation with *Cxcr4* haploinsufficient bone marrow (related to Figure 6)**

Bone marrow cells from *Cxcr4*<sup>+/-</sup> donors on a homozygous CD45.2 background were mixed equally with bone marrow cells from either : *Cxcr4*<sup>+/*S338X*</sup> donors on a heterozygous CD45.1/CD45.2 background (*Cxcr4*<sup>+/-</sup>/*Cxcr4*<sup>+/*S338X*</sup>) or *Cxcr4*<sup>+/+</sup> donors on a heterozygous CD45.1/CD45.2 background (*Cxcr4*<sup>+/-</sup>/*Cxcr4*<sup>+/+</sup>). Five million bone marrow cells from the mixed pairings were then

injected intravenously into each CD45.1 recipient mouse that had been lethally irradiated 8 hours before infection. Mouse blood was analyzed 39 weeks after bone marrow transplantation for total white blood cell and differential counts (5 recipient mice for each donor pair).

## **Extended Experimental Methods**

### **Flow Cytometry, Cell Purification, and Culture**

Patient cells were isolated from heparinized blood or bone marrow aspirate and purified by Ficoll-Hypaque centrifugation and stained as previously described (McDermott et al., 2014). Cell purification was performed either using magnetic bead selection (Miltenyi Biotec, Cambridge, MA) following manufacturer recommendations for blood samples or using a sorting cytometer (FACS Aria II, BD Biosciences, San Jose, CA) for bone marrow samples. Flow cytometric data were analyzed using FlowJo v10 software (TreeStar Inc., Ashland, OR). Peripheral blood mononuclear cells (PBMC) and purified bone marrow cells were cultured to expand CD34<sup>+</sup> hematopoietic progenitor cells (HPC), and PBMC were used to create lymphoblastoid cell lines (LCL) from Epstein-Barr virus (EBV)-transformed B cells. 100 µl of mouse blood was collected from the mandibular vein into EDTA anticoagulant tubes (Becton Dickinson, Franklin Lakes, NJ), then 2 µl of Fc block (BioLegend, San Diego, CA) was added and incubated for 10 min prior to incubation with specific antibodies on ice for 30 min. Red blood cells were then lysed with 1 ml ACK lysis buffer (Quality Biologicals, Inc., Gaithersburg, MD) for 1 min at room temperature before centrifugation. Cells were then washed twice with flow cytometry buffer, fixed with 1% paraformaldehyde, stored on ice, and analyzed using an LSRII FACS cytometer (BD Biosciences).

### **Mutation Detection and Sanger DNA Sequencing**

Polymerase chain reaction - restriction fragment length polymorphism (PCR-RFLP) analysis was performed as previously described (Hernandez et al., 2003) using genomic DNA isolated from purified cell populations or whole blood. Amplification utilized the following two primers: 5'-ATCCTCTATGCTTTCCTTGGAGCC-3' and 5'-GTGGAAACAGATGAATGTCCACCGC-3' which

generate a 126 bp amplicon from both the wild type *CXCR4* allele and the *CXCR4*<sup>R334X</sup> (1000C-->T) mutant allele that causes WHIM syndrome. The mutation destroys a naturally occurring *Bst*UI restriction enzyme site in the amplicon, such that the enzyme does not cut the mutant amplicon but generates 104 and 22 bp digested fragments from the wild type amplicon. In addition the same DNA was subjected to traditional Sanger method DNA sequencing at a Clinical Laboratory Improvement Amendment of 1988 (CLIA-88) certified core facility. We also designed a PCR assay using the following 2 primers: 5'-GGAATCTCACATCCAGAATCATGC-3' and 5'-TTGTTCTCACCTTTGGCCAGTGG-3' which selectively generate a 242 bp amplicon spanning the junction of pieces 13 and 16 in the patient's derivative chromothriptic chromosome 2. Amplicons for 3 other chromothriptic junctions yielded similar results (data not shown).

### **Cytogenetics**

Cytogenetic analysis was performed on bone marrow aspirate samples, purified CD19<sup>+</sup> B cells, and LCL cell lines using standard techniques (Quest Diagnostics, Chantilly, VA). GTW (G-banding by Trypsin treatment followed by Wright stain) banded metaphases were obtained using established harvesting and banding techniques.

### **Fluorescence in situ hybridization (FISH)**

FISH was performed with Abbott Molecular probes (Abbott Molecular, Des Plaines, IL) following the manufacturer's recommended protocol.

### **Affymetrix CytoScan<sup>®</sup> HD SNP-oligo microarray**

Affymetrix Cytoscan HD array (Affymetrix, Santa Clara, CA) was used to identify chromosomal breakpoints using DNA from the same cells used in cytogenetic analysis, purified neutrophils and skin fibroblasts. Microarray analysis was performed following the manufacturer's protocol. Each sample was digested with *NspI*, ligated to adaptors, and amplified with PCR. The PCR product was purified using a magnetic separation technique, fragmented, and labeled before hybridization to the microarray. The oligo-SNP array contains approximately 2.67 million probes, including 1.9 million copy number probes and 750,000 SNP probes. Copy number alterations were analyzed using Chromosome Analysis Suite (ChAS) software (Affymetrix).

### **Molecular Pathology Testing and Cytokine Analysis**

A formalin-fixed, paraffin-embedded (FFPE) block was obtained from the patient's spleen, removed by surgical splenectomy in 1963. This was examined histologically and DNA was extracted using a standard protocol. The DNA was then used in the *BstU1* PCR-RFLP analysis. A variety of short tandem repeat (STR) loci were compared between the patient's neutrophil and buccal DNA using an STR chimerism assay developed for the tracking of bone marrow transplant engraftment at the Hematology Service, Division of Laboratory Medicine, NIH Clinical Center. This assay is capable of detecting 5-95% donor chimerism and has a standard deviation of  $\pm 5\%$ . Purified CD3<sup>+</sup> and CD19<sup>+</sup> DNA were checked for T and B cell clonality using previously published methods (Lawnicki et al., 2003; Ramasamy et al., 1992; van Dongen et al., 2003). Finally, a specific mutation (V617F) in the *JAK2* oncogene and presence of the *BCR-ABL* gene fusion were queried using DNA sequencing and a specific real time PCR assay, respectively (further detailed below).



## **Whole Genome Sequencing and Analysis**

DNA from fibroblasts obtained from a skin biopsy and from peripheral blood neutrophils were used to prepare paired-end libraries using the TruSeq DNA protocol following the manufacturer's instructions (Illumina Inc., San Diego, CA). For each DNA sample, two different size libraries were generated, one of 200 to 400 bp and one of 300 to 500 bp. Each library was sequenced on 2 lanes of a HiSeq 2000 next generation sequencer (Illumina) generating ~380 million reads per library of 2 x 100 bp paired-ends. Reads were trimmed for adaptor and poor quality sequence and mapped to build hg19 of the human genome using the fusion search option in publically available Tophat2 software from the McKusick-Nathans Institute of Genetic Medicine (Kim et al., 2013). The output from this software (fusion.out file) was used to identify candidate fusion junctions that were present in the neutrophil but not the fibroblast samples. All fusion junctions were verified by visual inspection using publicly available Integrative Genomics Viewer (IGV version 2.3) software from the Broad Institute (Robinson et al., 2011). Rearrangements were visualized using publicly available Circos software from the Canadian Michael Smith Genome Centre (Krzywinski et al., 2009).

## **Flow Cytometric Sorting, HSC selection and culture, and Colony-Forming Cell Assays**

A FACS Aria II (SORP) fluorescence activated cell sorter (Becton-Dickinson Biosciences, San Jose, CA), equipped with 405 nm, 488 nm, 561 nm, and 633 nm lasers, was used to sort cells. For sorting of hematopoietic progenitors from human bone marrow, Enrich mode (Purity mask=0; Yield mask=8) was performed first using anti human CD34-Phycoerythrin (Biolegend, San Diego, CA) to select CD34<sup>+</sup> cells followed by Purity mode sorting for HSC, CLP, CMP, and GMP populations using the following monoclonal Abs:

CD135-Allophycocyanin, CD10- Fluorescein Isothiocyanate, CD45-PerCP, CD90-Alexa Fluor 700, CD45RA-Pacific Blue (all from Biolegend, San Diego, CA) and CD38-PECy7 (BD Biosciences, San Jose, CA). The following purified anti-human monoclonal antibodies labeled with fluorochromes were obtained from BD Biosciences and used for leukocyte subset sorting from whole blood: CD14-Fluorescein Isothiocyanate, CD19- Phycoerythrin, CD4-Allophycocyanin, and CD8-Pacific Blue. NK cells were purified from whole blood by positive selection using biotin-conjugated anti-human monoclonal antibody to CD56 (BD Biosciences, San Jose, CA) and anti-biotin microbeads (Miltenyi Biotec, San Diego, CA). Anti-human monoclonal antibodies used for sorting of leukocyte subsets from bone marrow included CD14-Fluorescein Isothiocyanate, CD19-Phycoerythrin, CD34-Allophycocyanin, and CD3-Alexa Fluor 700 (BD Biosciences). In other experiments, blood and bone marrow derived CD34<sup>+</sup> cells were positively selected with Miltenyi Biotec (San Diego, CA) microbeads then were cultured using the Arteriocyte (Hopkinton, MA) NANEX HSC expansion system following the manufacturer's directions. In some experiments, the CD34<sup>+</sup> cells were cultured in HSC expansion serum free media (Stem Cell Technologies, Vancouver, Canada) supplemented with the cytokine cocktail (hSCF, hTPO, hflt3-L) obtained from Peprotech (Rocky Hill, NJ) and human LDL from Athens Research and Technology (Athens, GA). Human colony-forming cell assays were done using Methocult medium purchased from Stem Cell Technologies (Vancouver, Canada) according to the manufacturer's instructions. Briefly, PBMCs were resuspended in IMDM+2% FBS medium at a concentration of  $2 \times 10^6$ /ml. Then 0.3 ml of PBMCs were added to 3 ml Methocult media, mixed vigorously, and allowed to stand at room temperature for 5 minutes. Then using a syringe, 1.1 ml of the mixture was injected into a well of a 6- well-plate. Each donor was tested in

duplicate. The plate was cultured for 14 days, followed by counting the BFU-E, CFU-GM and CFU-GEMM colonies. For DNA isolation from BFU-E colonies, we collected the BFU-E colonies under light microscopic guidance and isolated genomic DNA.

### **T cell clonality testing**

DNA was extracted from peripheral blood cells using an automated DNA extraction system and tested for quality prior to PCR amplification for detection of T cell receptor (TRG locus) gene rearrangements. A single multiplexed PCR reaction was performed as described by Lawnicki et al. using primers that interrogate TRG rearrangements involving all of the known Vg family members, and the Jg1/2, JP1/2 and JP joining segments. (Lawnicki et al., 2003) To allow for fluorescence detection, each joining region primer was covalently linked to a unique fluorescent dye. The products were analyzed by capillary electrophoresis on an ABI 3130xl Genetic Analyzer, and electropherograms were analyzed using GeneMapper software version 4 (Applied Biosystems, Life Technologies, Grand Island, NY). A polyclonal rearrangement pattern was detected and there was no evidence of a clonal T-cell process, within the detection limits of the assay. TRG PCR is capable of detecting a clonal population comprising a minimum of 2-5% of the total T-cell population, and as performed at the NIH-Clinical Center, can identify > 90-95% of all TRG gene rearrangements occurring in clonal T-cell proliferations.

### **B cell clonality testing**

DNA from peripheral blood cells isolated as above was PCR-amplified for detection of immunoglobulin (IGH and IGk loci) gene rearrangements. For the IGH locus, two separate reactions were performed, one using consensus primers to framework region III and

the joining region of the immunoglobulin heavy chain gene (FRIII-IGH PCR) and a second using primers directed to the framework region II and the joining region of the immunoglobulin heavy chain gene (FRII-IGH PCR) as described by Ramasamy, et al. (Ramasamy et al., 1992) Primers directed to the joining region were linked to the fluorescent marker FAM (carboxyfluorescein). Two additional reactions were performed for the IG $\kappa$  locus using the Biomed II primer set described by van Dongen et al and supplied by InVivoScribe Technologies (San Diego, CA) using the IGK Gene clonality assay and ABI Fluorescence Detection).(van Dongen et al., 2003) These reactions interrogate rearrangements involving the V $\kappa$  loci and J $\kappa$ , the V $\kappa$  locus and the  $\kappa$ DE locus, and the  $\kappa$  intron RSS locus and the  $\kappa$ DE locus. Products were run on an ABI 3130xl Genetic Analyzer and electropherograms were analyzed using GeneMapper software version 4 (ABI). Polyclonal rearrangement patterns were detected in all reactions and there was no evidence of clonal B cell proliferation within the limits of the assay. These assays performed at the NIH-Clinical Center are capable of detecting a clonal population comprising 2-10% of the total B cell population and can identify about 85-90% of all clonal B cell proliferations.

### **JAK2 and BCR-ABL Mutation Analysis**

The JAK2 V617F mutation was not detected on CLIA-88 approved testing developed by Ipsogen (Qiagen, Germantown, MD). A quantitative PCR assay was used to determine the relative levels of BCR-ABL and ABL using cDNA obtained by reverse transcribing RNA extracted from peripheral blood leukocytes. The levels of BCR-ABL and ABL were quantitated by comparison to plasmid reference standards using real time PCR. The ratio (BCR-ABL/ABL) was found in WHIM-09 to be 0.12%. In patients with newly diagnosed or relapsed chronic myeloid leukemia this typically varies between 50-150%. The coefficient of variation for replicate assays at the NIH-Clinical Center is 40-50%.

## Competitive Mouse Bone Marrow Repopulation Experiments

To study the selective advantage for long-term engraftment of transplanted *Cxcr4*<sup>+/-</sup> donor bone marrow over donor bone marrow from the *Cxcr4*<sup>+/-S338X</sup> mouse model of WHIM syndrome (Figure 5A), bone marrow cells from *Cxcr4*<sup>+/-</sup> donors on a CD45.2 background and from *Cxcr4*<sup>+/-S338X</sup> donors on a heterozygous CD45.1/CD45.2 background were mixed equally and injected intravenously into CD45.1 congenic recipient mice that had been lethally irradiated 8 hours previously. Peripheral blood was drawn every 2 weeks until day 105 after transplant and the differential was determined by flow cytometry. The monoclonal Abs used were CD45.1- PECy7 and CD45.2-eFlour450 from eBioscience, and Ly6G-APC-Cy7, CD11b-PerCP-Cy5.5, CD19-TITC, and CD3-APC from Biolegend. 5 male and 5 female recipient mice were tested with similar results and the data were combined for the Figure; the results were verified in one additional independent experiment. To study the selective advantage for long-term engraftment of transplanted *Cxcr4*<sup>+/-</sup> over *Cxcr4*<sup>+/+</sup> donor bone marrow (Figure 5B), bone marrow cells from *Cxcr4*<sup>+/-</sup> donors on a CD45.2 background were mixed with bone marrow cells from *Cxcr4*<sup>+/+</sup> donors on a CD45.1 background (42%:58%, respectively) and then injected intravenously into 5 male congenic CD45.1 and 5 male congenic CD45.2 recipient mice that had been lethally irradiated 8 hours previously. Peripheral blood was drawn every 2 weeks until day 303 after transplant and leukocyte subsets was determined by flow cytometry. The results were similar for both congenic recipients, and the data were combined in the figure shown. The results were verified in two additional independent experiments. Mice in the first experiment were sacrificed at day 303 post transplantation and bone marrow was harvested for HSC and HPC quantification by flow cytometry. The additional monoclonal Abs used for this

analysis were Lin-FITC (FITC conjugated antibodies against lineage markers including B220, CD3, CD4, CD8, CD11b, Gr1, and Ter119), Sca1-APC-Cy7, c-Kit-APC, Flt3-PE-Cy5, and IL-7R $\alpha$ -Violet 605 (all from Biolegend) and biotinylated CD34-streptavidin-PE (clone RAM) from eBioscience. To study the proliferation of HSCs (Figure 6A), bone marrow cells from donors with a *Cxcr4*<sup>+/-</sup> genotype on a homozygous CD45.2 background were mixed (47%:53%) with bone marrow cells from donors with a *Cxcr4*<sup>+/+</sup> genotype on a heterozygous CD45.1/CD45.2 background and then 5 million bone marrow cells were injected intravenously into each CD45.1 recipient mouse that had been lethally irradiated 8 hours prior. Six days after bone marrow transplantation, each mouse was given 1.25 mg of BrdU I.P. Twenty hours later, the mice were euthanized for HSC proliferation analysis. The experiment was repeated once with similar results. Lineage depletion of mouse bone marrow cells was performed with a Lineage Depletion Kit from Miltenyi Biotec (San Diego, CA). Briefly, whole mouse bone marrow cells were magnetically labeled with a cocktail of biotinylated antibodies against a panel of “lineage” antigens (CD5, CD45R [B220], CD11b, Anti-Gr-1 [Ly-6G/C], 7-4, and Ter-119 antibodies) and Anti-Biotin MicroBeads. The cells were then run through magnetic column of autoMACS™ separator, and the unlabeled lineage negative cells were collected for transplantation.

### Supplemental References

- Hernandez, P.A., Gorlin, R.J., Lukens, J.N., Taniuchi, S., Bohinjec, J., Francois, F., Klotman, M.E., and Diaz, G.A. (2003). Mutations in the chemokine receptor gene CXCR4 are associated with WHIM syndrome, a combined immunodeficiency disease. *Nat Genet* 34, 70-74.
- Kim, D., Pertea, G., Trapnell, C., Pimentel, H., Kelley, R., and Salzberg, S.L. (2013). TopHat2: accurate alignment of transcriptomes in the presence of insertions, deletions and gene fusions. *Genome biology* 14, R36.
- Krzywinski, M., Schein, J., Birol, I., Connors, J., Gascoyne, R., Horsman, D., Jones, S.J., and Marra, M.A. (2009). Circos: an information aesthetic for comparative genomics. *Genome research* 19, 1639-1645.
- Lawnicki, L.C., Rubocki, R.J., Chan, W.C., Lytle, D.M., and Greiner, T.C. (2003). The distribution of gene segments in T-cell receptor gamma gene rearrangements demonstrates the need for multiple primer sets. *The Journal of molecular diagnostics : JMD* 5, 82-87.
- Mayle, A., Luo, M., Jeong, M., and Goodell, M.A. (2013). Flow cytometry analysis of murine hematopoietic stem cells. *Cytometry Part A : the journal of the International Society for Analytical Cytology* 83, 27-37.
- McDermott, D.H., Liu, Q., Velez, D., Lopez, L., Anaya-O'Brien, S., Ulrick, J., Kwatemaa, N., Starling, J., Fleisher, T.A., Priel, D.A., *et al.* (2014). A phase 1 clinical trial of long-term, low-dose treatment of WHIM syndrome with the CXCR4 antagonist plerixafor. *Blood* 123, 2308-2316.
- Ramasamy, I., Brisco, M., and Morley, A. (1992). Improved PCR method for detecting monoclonal immunoglobulin heavy chain rearrangement in B cell neoplasms. *Journal of clinical pathology* 45, 770-775.
- Robinson, J.T., Thorvaldsdottir, H., Winckler, W., Guttman, M., Lander, E.S., Getz, G., and Mesirov, J.P. (2011). Integrative genomics viewer. *Nature biotechnology* 29, 24-26.
- van Dongen, J.J., Langerak, A.W., Bruggemann, M., Evans, P.A., Hummel, M., Lavender, F.L., Delabesse, E., Davi, F., Schuurin, E., Garcia-Sanz, R., *et al.* (2003). Design and standardization of PCR primers and protocols for detection of clonal immunoglobulin and T-cell receptor gene recombinations in suspect lymphoproliferations: report of the BIOMED-2 Concerted Action BMH4-CT98-3936. *Leukemia* 17, 2257-2317.
