# Supplementary material
Source: PubMed Central journal article supplement (PMC4329071)

**A**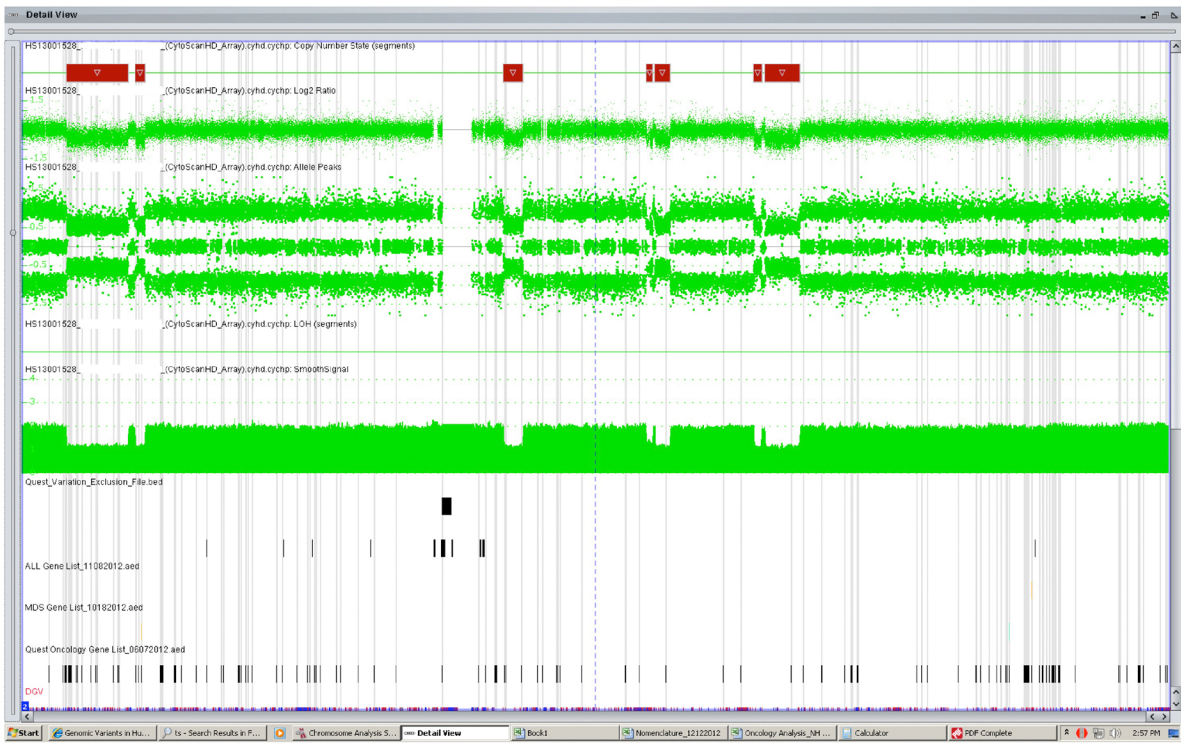**B**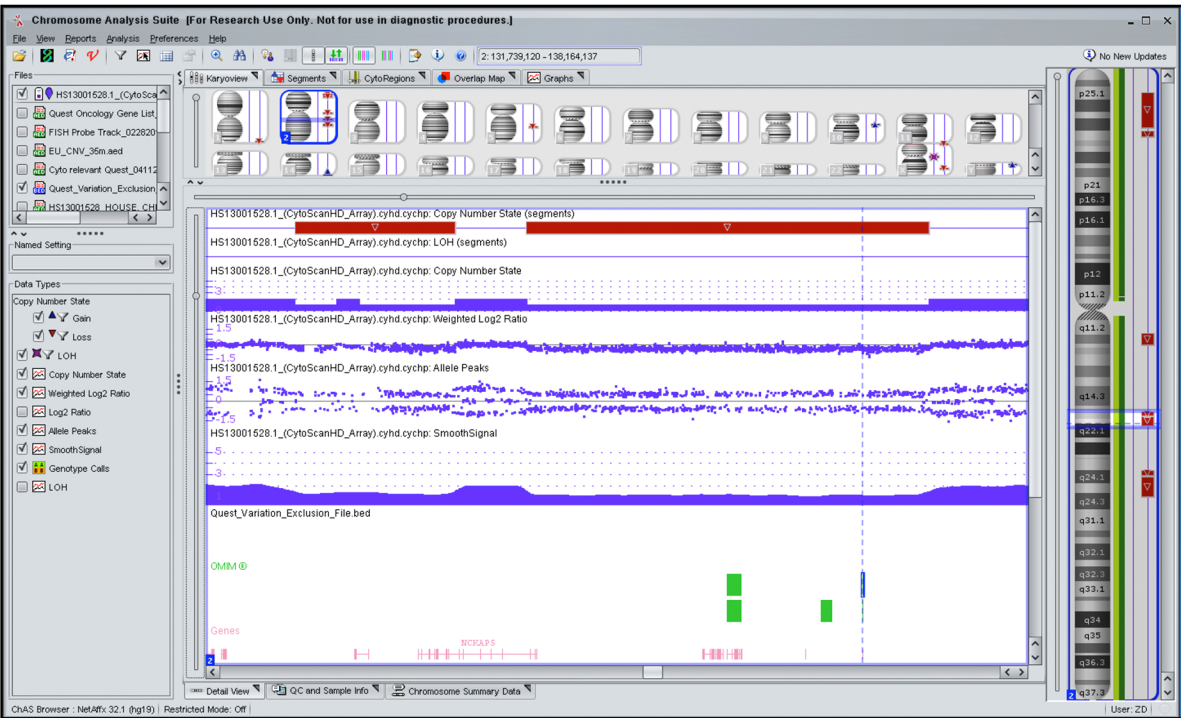**Supplemental Figure 2**

Supplement: NIHMS655808-supplement-4.pdf [file NIHMS655808-supplement-4.pdf]

**A**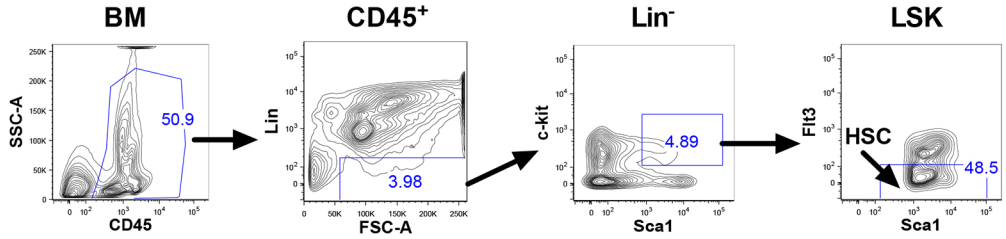**B**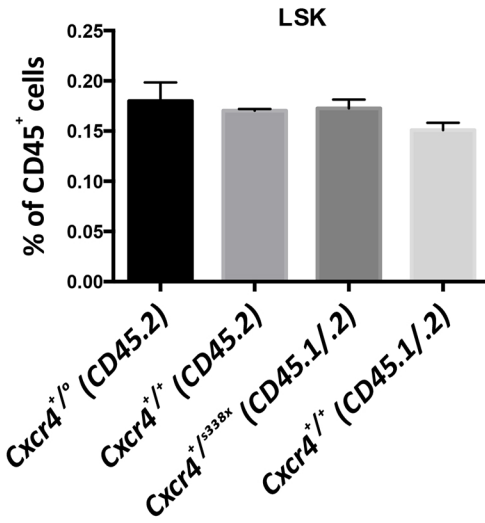**C**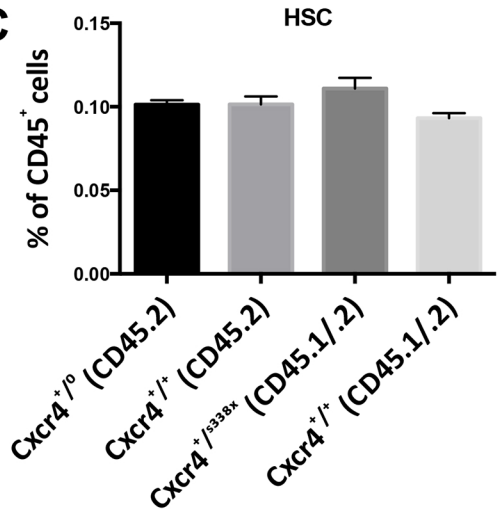

Supplement: NIHMS655808-supplement-Fig_S5.pdf [file NIHMS655808-supplement-Fig_S5.pdf]

**A**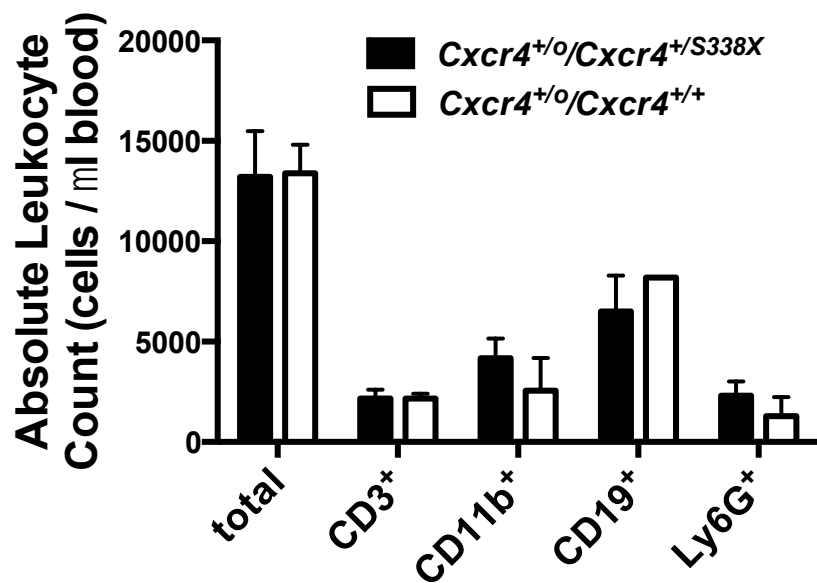**B**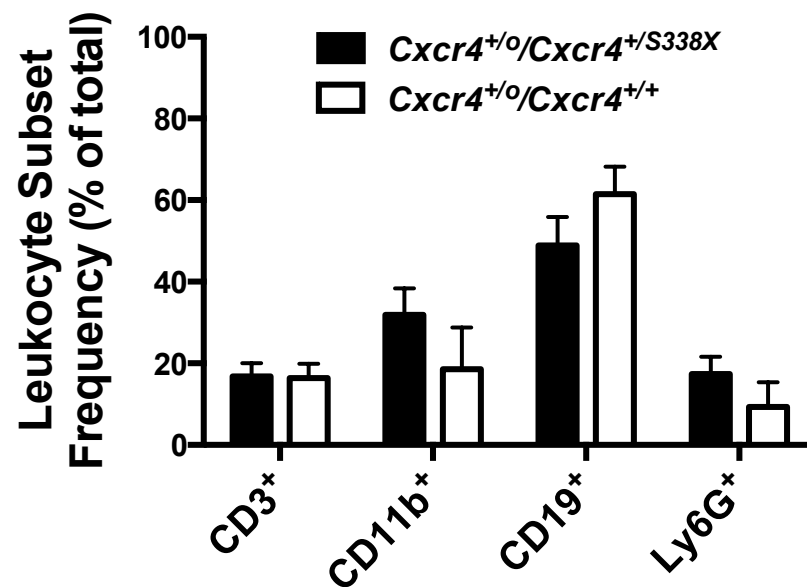

Supplement: NIHMS655808-supplement-Fig_S7.pdf [file NIHMS655808-supplement-Fig_S7.pdf]
